# Supplementary material for: Disease History and Life History Predict Behavioral Control of the COVID-19 Pandemic
Source: PubMed Central journal article supplement — Evol Psychol. 2021 Mar 23;19(1):14747049211000714. doi: 10.1177/14747049211000714 (PMC10303449; doi:10.1177/14747049211000714), 2021-03-23
Supplement: sj-pdf-1-evp-10.1177_14747049211000714.pdf [file sj-pdf-1-evp-10.1177_14747049211000714.pdf]

## Supplementary Material

Zero-order correlation between historical pathogen prevalence and days taken to lockdown, which is the number of days that had passed since the first identified COVID-19 case in a country before the country introduced lockdown measures, was significant ( $r = -.23$ ,  $p < .05$ ). Zero-order correlation between slow life history strategy and days taken to lockdown was significant ( $r = -.23$ ,  $p < .05$ ).

Zero-order correlation between historical pathogen prevalence and days taken to close schools, which is the number of days that had passed since the first identified COVID-19 case in a country before schools were ordered to close, was significant ( $r = -.25$ ,  $p < .01$ ). Zero-order correlation between slow life history strategy and days taken to close schools was significant ( $r = -.33$ ,  $p < .001$ ).

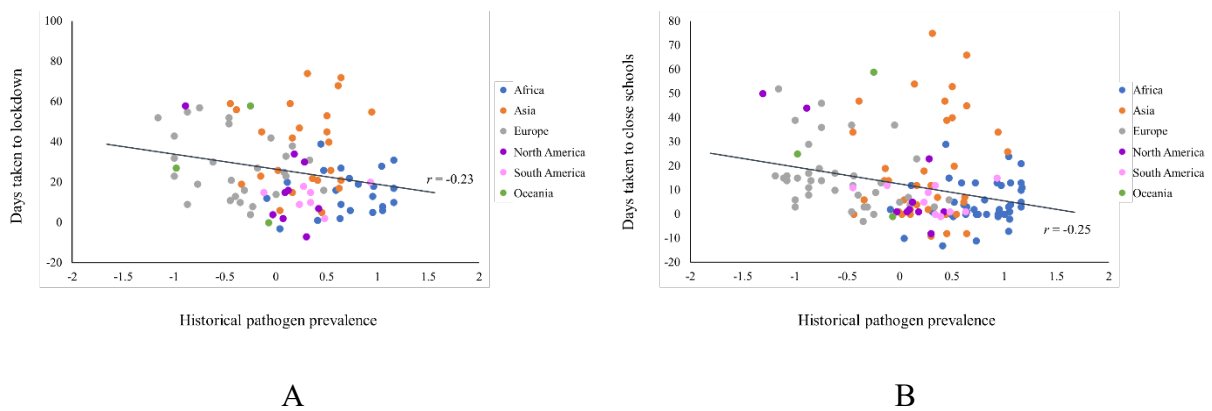

**Supplementary Fig. 1** Correlation between historical pathogen prevalence and (A) days taken to lockdown, (B) days taken to close schools

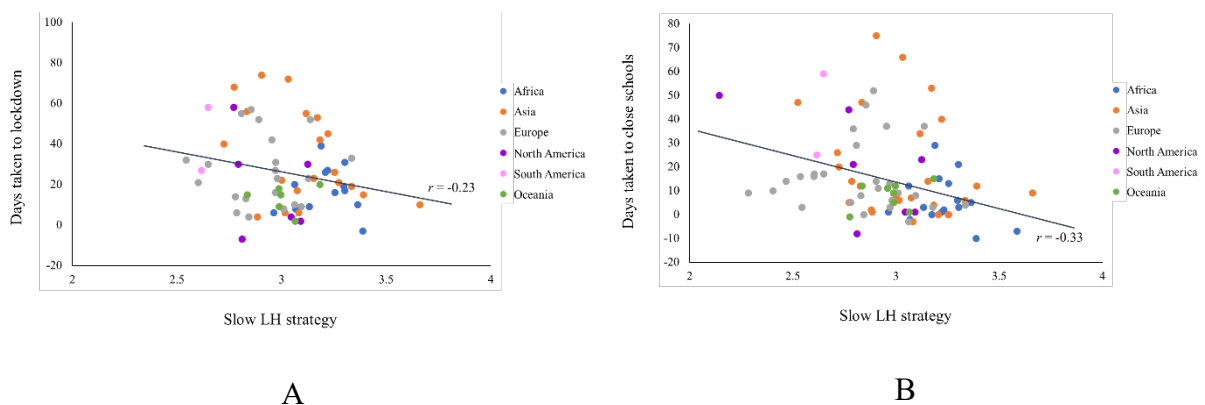

**Supplementary Fig. 2** Correlation between slow LH strategy and (A) days taken to lockdown, (B) days taken to close schools

We also controlled for other potential social (i.e., Democratic Index), economic (i.e., GDP; Health expenditure as percentage of GDP), and health-related confounding variables (i.e., Total fertility rate per woman; Age-standardized mortality of all causes per 100,000 population). After controlling for all five variables, our hypothesized predictions involving both historical pathogen prevalence and slow LH strategy remain supported.

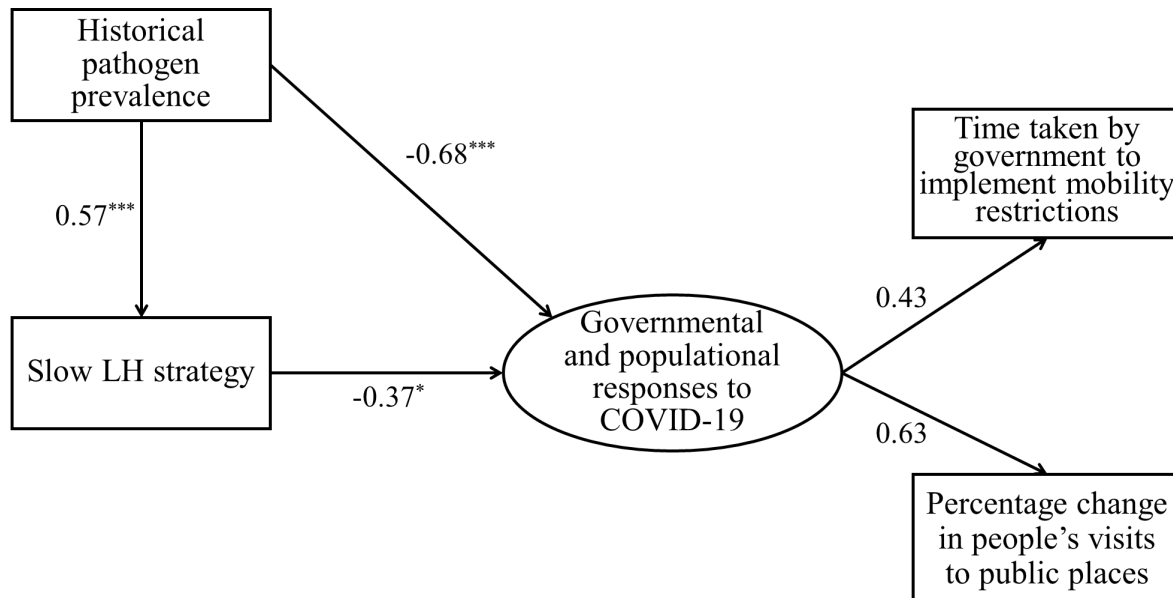

**Supplementary Fig. 3** Path analysis of the associations among historical pathogen prevalence, slow LH strategy, and governmental and populational responses to COVID-19, after controlling for Democratic index, GDP, Health expenditure as percentage of GDP, Total fertility rate per woman, and Age-standardized mortality of all causes per 100,000 population

The 17 WVS items (World Values Survey Association, 2014) grouped by the ALHB subscales (Figueredo et al., 2007; Figueredo et al, 2006; Figueredo et al., 2017)

\* indicates reversed coding

#### Insight, planning, and control

V8\*: For the following, indicate how important it is in your life: Work (1: very importance, 4: not at all important)

V75\*: Please indicate for the following description whether that person is very much like you, like you, somewhat like you, not like you, or not at all like you: Being very successful is important to this person; to have people recognize one's achievements (1: very much like me, 6 not at all like me)

V160C\*: I see myself as someone who tends to be lazy (1: disagree strongly, 5: agree strongly)

#### Parental relationship quality; Family social contact and support

V49\*: For the following statement, can you tell me how strongly you agree or disagree with it: One of my main goals in life has been to make my parents proud (1: strongly agree, 4 strongly disagree)

V79\*: Please indicate for the following description whether that person is very much like you, like you, somewhat like you, not like you, or not at all like you: Tradition is important to this person; to follow the customs handed down by one's religion or family (1: very much like me, 6 not at all like me)

V250\*: Do you live with your parents? (1: yes, 2: no)

#### Friends' social contact and support

V5\*: For the following, indicate how important it is in your life: Friend (1: very importance, 4: not at all important)

V103\*: How much you trust people from the following group: Your neighborhood (1: trust completely, 4 do not trust at all)

V60-61: People sometimes talk about what the aims of this country should be for the next ten years. Would you say the following goal you, yourself, consider the most important? Seeing that people have more say about how things are done at their jobs and in their communities (1: not most important, 2: secondly important, 3: first important)

#### General altruism

V74\*: Please indicate for the following description whether that person is very much like you, like you, somewhat like you, not like you, or not at all like you. It is important to this person to do something for the good of society (1: very much like me, 6 not at all like me)

V74B\*: Please indicate for the following description whether that person is very much like you, like you, somewhat like you, not like you, or not at all like you. It is important for this person to help the people nearby; to care for their well-being (1: very much like me, 6 not at all like me)

V160B: I see myself as someone who is generally trusting (1: disagree strongly, 5: agree strongly)

#### Religiosity

V9\*: For the following, indicate how important it is in your life. Religion (1: very importance, 4: not at all important)

V79\*: Please indicate for the following description whether that person is very much like you, like you, somewhat like you, not like you, or not at all like you. Tradition is important to this person; to follow the customs handed down by one's religion or family (1: very much like me, 6 not at all like me)

V145\*: Apart from weddings and funerals, about how often do you attend religious services these days? (1: more than once a week, 2: once a week, 3: once a month, 4: only on special holy days, 5: once a year, 6: less often, 7: never, practically never)

V153\*: Whether you strongly agree, agree, disagree, or strongly disagree with the following statement: Whenever science and religion conflict, religion is always right. (1: strongly agree, 4: strongly disagree)

V154\*: Whether you strongly agree, agree, disagree, or strongly disagree with the following statement: The only acceptable religion is my religion (1: strongly agree, 4: strongly disagree)

#### References

- Figueredo, A. J., Garcia, R. A., Menke, J. M., Jacobs, W. J., Gladden, P. R., Bianchi, J., ... & Jiang, Y. (2017). The K-SF-42: A new short form of the Arizona Life History Battery. *Evolutionary Psychology, 15*, 1474704916676276. doi: 10.1016/j.paid.2005.06.009
- Figueredo, A. J., Vásquez, G., Brumbach, B. H., & Schneider, S. M. (2007). The K-factor, covitality, and personality. *Human Nature, 18*, 47–73. doi: 10.1007/BF02820846
- Figueredo, A. J., Vásquez, G., Brumbach, B. H., Schneider, S. M., Sefcek, J. A., Tal, I. R., ... & Jacobs, W. J. (2006). Consilience and life history theory: From genes to brain to reproductive strategy. *Developmental Review, 26*, 243–275. doi: 10.1016/j.dr.2006.02.002
- World Values Survey Association (2014). World Values Survey: All Rounds-Country-Pooled Datafile 1981-2014. Madrid: JD Systems Institute. Retrieved from <http://www.worldvaluessurvey.com>
